# Supplementary material
Source: publisher site journal article supplement (https://www.dovepress.com/article/125564)
Supplement: Supplementary file 1 [file get_supplementary_file.php]

## Supplementary materials

### Figure S1. Delphi questionnaire

#### 1. COPD patients with FEV1 > 50%, not symptomatic

1.1 Do you think it is useful to start therapy with long-acting bronchodilators in COPD patients, in the absence of symptoms?

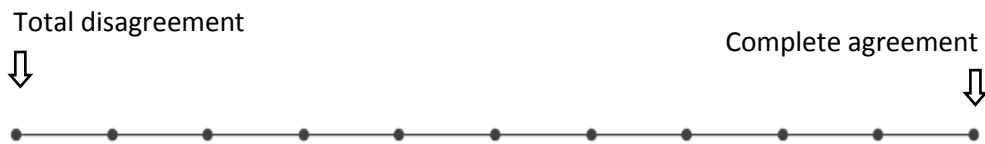

What is your rationale for this choice?

Do you have other comments?

**2. COPD patients with FEV1>50% , symptomatic**

**2.1 If a symptomatic COPD patient with FEV1>50% is treated with one long-acting bronchodilator, what should be the first choice?**

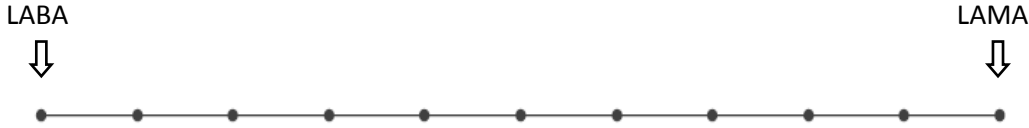

What is your rationale for this choice?

Do you have other comments?

**2.2 What should be the first choice when treating a symptomatic COPD patient with FEV1>50%? Single or dual bronchodilation?**

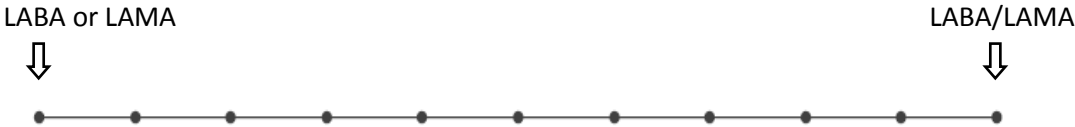

What is your rationale for this choice?

Do you have other comments?

**2.3 When a COPD patient with FEV1>50% remains symptomatic despite treatment with a single bronchodilator, a treatment with a combination of LABA/LAMA is the best choice.**

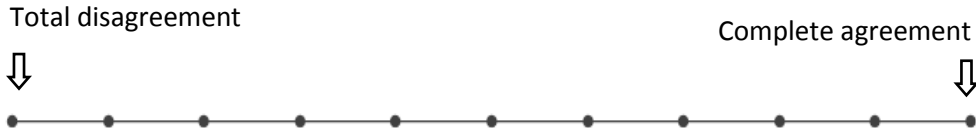

What is your rationale for this choice?

Do you have other comments?

**2.4 When a COPD patient with FEV1>50% had one exacerbation (requiring treatment with oral corticosteroids and/or antibiotics, but no hospitalization) in the previous 12 months despite treatment with a LAMA, a combination of LABA/LAMA is the best choice.**

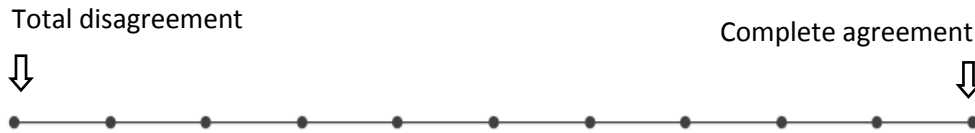

What is your rationale for this choice?

Do you have other comments?

**2.5 When a COPD patient with FEV1>50% had one exacerbation (requiring treatment with oral corticosteroids and/or antibiotics, but no hospitalization) in the previous 12 months despite treatment with a LABA, a combination of LABA/LAMA is the best choice.**

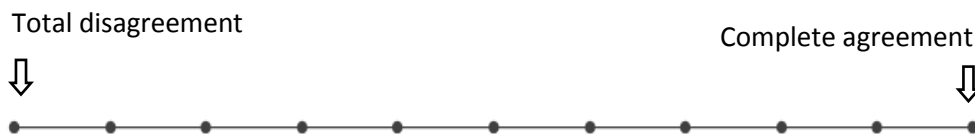

What is your rationale for this choice?

Do you have other comments?

**2.6 When a COPD patient with FEV1>50% had one exacerbation (requiring treatment with oral corticosteroids and/or antibiotics, but no hospitalization) in the previous 12 months, an ICS should be added.**

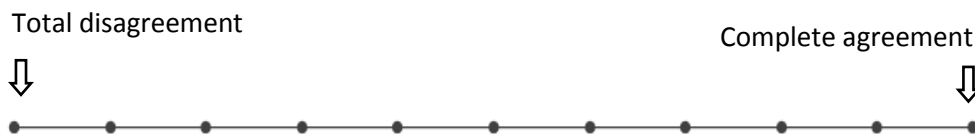

What is your rationale for this choice?

Do you have other comments?

**3. COPD Patient with FEV1 < 50% but not symptomatic**

**3.1 What should be the first choice when treating this patient?**

Not  
appropriate  
↓

Entirely  
appropriate  
↓

|                  |   |   |   |   |   |   |   |   |   |   |    |
|------------------|---|---|---|---|---|---|---|---|---|---|----|
| a) SABA/SAMA     | 0 | 1 | 2 | 3 | 4 | 5 | 6 | 7 | 8 | 9 | 10 |
| b) LABA          | 0 | 1 | 2 | 3 | 4 | 5 | 6 | 7 | 8 | 9 | 10 |
| c) LAMA          | 0 | 1 | 2 | 3 | 4 | 5 | 6 | 7 | 8 | 9 | 10 |
| d) LABA/ICS      | 0 | 1 | 2 | 3 | 4 | 5 | 6 | 7 | 8 | 9 | 10 |
| e) LABA/LAMA     | 0 | 1 | 2 | 3 | 4 | 5 | 6 | 7 | 8 | 9 | 10 |
| f) LABA/LAMA/ICS | 0 | 1 | 2 | 3 | 4 | 5 | 6 | 7 | 8 | 9 | 10 |

What is the rationale for this choice?

Do you have other comments?

**4. Symptomatic COPD patients with either FEV1 < 50% and/or 2 exacerbations and/or 1 hospitalization for an exacerbation in the previous 12 months**

**4.1 What should be the first choice when treating a symptomatic COPD patient, with FEV1 ≤ 50%, but no exacerbations in the previous 12 months?**

Not appropriate

Entirely appropriate

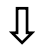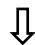

|                  |   |   |   |   |   |   |   |   |   |   |    |
|------------------|---|---|---|---|---|---|---|---|---|---|----|
| a) LAMA          | 0 | 1 | 2 | 3 | 4 | 5 | 6 | 7 | 8 | 9 | 10 |
| b) LABA/ICS      | 0 | 1 | 2 | 3 | 4 | 5 | 6 | 7 | 8 | 9 | 10 |
| c) LABA/LAMA     | 0 | 1 | 2 | 3 | 4 | 5 | 6 | 7 | 8 | 9 | 10 |
| d) LABA/LAMA/ICS | 0 | 1 | 2 | 3 | 4 | 5 | 6 | 7 | 8 | 9 | 10 |

What is the rationale for this choice?

Do you have other comments?

**4.2 If the same patient, with FEV1 ≤ 50%, but no exacerbations in the previous 12 months remains symptomatic *after initial treatment with a LAMA*, what should be the most appropriate treatment?**

Not appropriate

Entirely appropriate

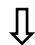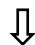

|                  |   |   |   |   |   |   |   |   |   |   |    |
|------------------|---|---|---|---|---|---|---|---|---|---|----|
| a) LABA          | 0 | 1 | 2 | 3 | 4 | 5 | 6 | 7 | 8 | 9 | 10 |
| b) LABA/ICS      | 0 | 1 | 2 | 3 | 4 | 5 | 6 | 7 | 8 | 9 | 10 |
| c) LABA/LAMA     | 0 | 1 | 2 | 3 | 4 | 5 | 6 | 7 | 8 | 9 | 10 |
| d) LABA/LAMA/ICS | 0 | 1 | 2 | 3 | 4 | 5 | 6 | 7 | 8 | 9 | 10 |

What is the rationale for this choice?

Do you have other comments?

**4.3 If the same patient, with FEV1≤50%, but no exacerbations in the previous 12 months remains symptomatic *after initial treatment with a LABA*, what should be the most appropriate treatment?**

Not appropriate

Entirely appropriate

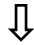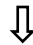

|                  |   |   |   |   |   |   |   |   |   |   |    |
|------------------|---|---|---|---|---|---|---|---|---|---|----|
| a) LAMA          | 0 | 1 | 2 | 3 | 4 | 5 | 6 | 7 | 8 | 9 | 10 |
| b) LABA/ICS      | 0 | 1 | 2 | 3 | 4 | 5 | 6 | 7 | 8 | 9 | 10 |
| c) LABA/LAMA     | 0 | 1 | 2 | 3 | 4 | 5 | 6 | 7 | 8 | 9 | 10 |
| d) LABA/LAMA/ICS | 0 | 1 | 2 | 3 | 4 | 5 | 6 | 7 | 8 | 9 | 10 |

What is the rationale for this choice?

Do you have other comments?

**4.4 If a symptomatic COPD patient has an FEV1≤50% but only 1 exacerbation (requiring treatment with oral corticosteroids and/or antibiotics, but no hospitalization) in the previous 12 months, what should be the first choice treatment?**

Not appropriate

Entirely appropriate

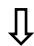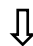

|                  |   |   |   |   |   |   |   |   |   |   |    |
|------------------|---|---|---|---|---|---|---|---|---|---|----|
| e) LAMA          | 0 | 1 | 2 | 3 | 4 | 5 | 6 | 7 | 8 | 9 | 10 |
| f) LABA/ICS      | 0 | 1 | 2 | 3 | 4 | 5 | 6 | 7 | 8 | 9 | 10 |
| g) LABA/LAMA     | 0 | 1 | 2 | 3 | 4 | 5 | 6 | 7 | 8 | 9 | 10 |
| h) LABA/LAMA/ICS | 0 | 1 | 2 | 3 | 4 | 5 | 6 | 7 | 8 | 9 | 10 |

What is the rationale for this choice?

Do you have other comments?

**4.5 If a COPD patient has an FEV1≤50% and 2 exacerbations (requiring treatment with oral corticosteroids and/or antibiotics) or 1 hospitalization for an exacerbation in the previous 12 months, what should be the first choice treatment?**

Not appropriate

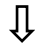

Entirely appropriate

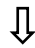

|                  |   |   |   |   |   |   |   |   |   |   |    |
|------------------|---|---|---|---|---|---|---|---|---|---|----|
| a) LAMA          | 0 | 1 | 2 | 3 | 4 | 5 | 6 | 7 | 8 | 9 | 10 |
| b) LABA/ICS      | 0 | 1 | 2 | 3 | 4 | 5 | 6 | 7 | 8 | 9 | 10 |
| c) LABA/LAMA     | 0 | 1 | 2 | 3 | 4 | 5 | 6 | 7 | 8 | 9 | 10 |
| d) LABA/LAMA/ICS | 0 | 1 | 2 | 3 | 4 | 5 | 6 | 7 | 8 | 9 | 10 |

What is the rationale for this choice?

Do you have other comments?

**4.6 An ICS should always be added to the treatment if a COPD patient had 2 or more exacerbations (requiring treatment with oral corticosteroids and/or antibiotics, but no hospitalization) in the previous 12 months.**

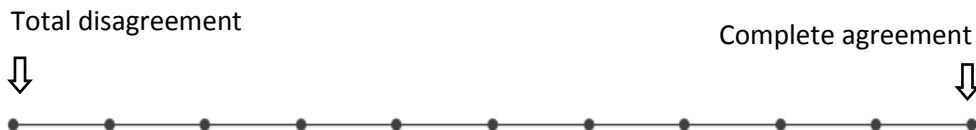

What is the rationale for this choice?

Do you have other comments?

**4.7 An ICS should always be added to the treatment if a COPD patient had an exacerbation requiring a hospitalization in the previous 12 months.**

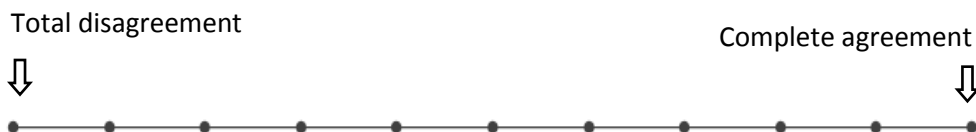

What is the rationale for this choice?

Do you have other comments?



**Table S1.** Rationales that were within the consensus range and were given by at least two participants in the first round

|                                                                                                                                                                                                                                                                                 |                                                                                                                                                                                                                                                                   |
|---------------------------------------------------------------------------------------------------------------------------------------------------------------------------------------------------------------------------------------------------------------------------------|-------------------------------------------------------------------------------------------------------------------------------------------------------------------------------------------------------------------------------------------------------------------|
| <b>1.1 Do you think it is useful to start therapy with long-acting bronchodilators in COPD patients with bronchial obstruction, in the absence of symptoms? YES/NO</b>                                                                                                          |                                                                                                                                                                                                                                                                   |
| <b>BE</b>                                                                                                                                                                                                                                                                       | <ul style="list-style-type: none"> <li>- Symptoms are very often un(der) recognized/ underestimated</li> <li>- UPLIFT sub analysis results for GOLD II FEV1 decline</li> </ul>                                                                                    |
| <b>EU</b>                                                                                                                                                                                                                                                                       | <ul style="list-style-type: none"> <li>- UPLIFT shows that this may have an impact on the FEV1 decline</li> <li>- Patients with such a low lung function will have reduced physical capacity even if not declaring symptoms</li> </ul>                            |
| <b>2.1 If a symptomatic COPD patient with FEV1&gt;50% is treated with one long-acting bronchodilator, what should be the first choice?</b>                                                                                                                                      |                                                                                                                                                                                                                                                                   |
| <b>BE</b>                                                                                                                                                                                                                                                                       | <ul style="list-style-type: none"> <li>- No evidence that one is better than the other for symptoms but LAMA better than LABA regarding exacerbations</li> <li>- No evidence of superiority</li> <li>- Depending on the patient (glaucoma? prostate?)</li> </ul>  |
| <b>EU</b>                                                                                                                                                                                                                                                                       | <ul style="list-style-type: none"> <li>- A variety of studies suggest that LAMAs and LABAs have similar efficacy regarding lung function and symptoms</li> <li>- Studies showed that LAMAs are better than LABAs regarding prevention of exacerbations</li> </ul> |
| <b>2.2 What should be the first choice when treating a symptomatic COPD patient with FEV1&gt;50%? Single or dual bronchodilation?</b>                                                                                                                                           |                                                                                                                                                                                                                                                                   |
| <b>BE</b>                                                                                                                                                                                                                                                                       | <ul style="list-style-type: none"> <li>- This depends on the symptoms</li> <li>- Follow-up and adjustment to dual if necessary</li> <li>- The effect of adding a second long acting bronchodilator on symptoms is modest</li> </ul>                               |
| <b>EU</b>                                                                                                                                                                                                                                                                       | <ul style="list-style-type: none"> <li>- Single may be sufficient</li> <li>- After LABA or LAMA step-up is possible</li> </ul>                                                                                                                                    |
| <b>2.3 When a COPD patient with FEV1&gt;50% remains symptomatic despite treatment with a single bronchodilator, a treatment with a combination of LABA/LAMA is the best choice.</b>                                                                                             |                                                                                                                                                                                                                                                                   |
| <b>BE</b>                                                                                                                                                                                                                                                                       | <ul style="list-style-type: none"> <li>- Studies on dual bronchodilation</li> <li>- The additive effect of the two bronchodilators on FEV1 and dyspnea</li> <li>- Logical step up</li> </ul>                                                                      |
| <b>EU</b>                                                                                                                                                                                                                                                                       | <ul style="list-style-type: none"> <li>- Most LABA/LAMA studies showed some superiority regarding patient reported outcomes compared to single bronchodilators</li> </ul>                                                                                         |
| <b>2.4. When a COPD patient with FEV1&gt;50% had one exacerbation (requiring treatment with oral corticosteroids and/or antibiotics, but no hospitalisation) in the previous 12 months <i>despite treatment with a LAMA</i>, a combination of LABA/LAMA is the best choice.</b> |                                                                                                                                                                                                                                                                   |
| <b>BE</b>                                                                                                                                                                                                                                                                       | <ul style="list-style-type: none"> <li>- Only one moderate exacerbation is not the sign of an uncontrolled COPD</li> <li>- More evidence is needed of low doses of steroids in these cases</li> </ul>                                                             |
| <b>EU</b>                                                                                                                                                                                                                                                                       | <ul style="list-style-type: none"> <li>- Improving bronchodilation</li> <li>- There is no sufficient evidence that adding ICS to LAMA will be effective</li> </ul>                                                                                                |
| <b>2.5. When a COPD patient with FEV1&gt;50% had one exacerbation (requiring treatment with oral corticosteroids and/or antibiotics, but no hospitalisation) in the previous 12 months <i>despite treatment with a LABA</i>, a combination of LABA/LAMA is the best choice.</b> |                                                                                                                                                                                                                                                                   |
| <b>BE</b>                                                                                                                                                                                                                                                                       | <ul style="list-style-type: none"> <li>- Dual bronchodilation will be more effective in preventing exacerbations</li> </ul>                                                                                                                                       |
| <b>EU</b>                                                                                                                                                                                                                                                                       | /                                                                                                                                                                                                                                                                 |
| <b>2.6 When a COPD patient with FEV1&gt;50% had one exacerbation (requiring treatment with oral corticosteroids and/or antibiotics, but no hospitalisation) in the previous 12 months, an ICS should be</b>                                                                     |                                                                                                                                                                                                                                                                   |

|                                                                                                                                                                                                                                                   |                                                                                                                                                                                                                                                                                                                                                |
|---------------------------------------------------------------------------------------------------------------------------------------------------------------------------------------------------------------------------------------------------|------------------------------------------------------------------------------------------------------------------------------------------------------------------------------------------------------------------------------------------------------------------------------------------------------------------------------------------------|
| <b>added.</b>                                                                                                                                                                                                                                     |                                                                                                                                                                                                                                                                                                                                                |
| <b>BE</b>                                                                                                                                                                                                                                         | <ul style="list-style-type: none"> <li>- A frequent exacerbator is &gt;1/year</li> <li>- There is evidence of additive effect of ICS in patients with frequent exacerbations</li> <li>- Only if suspicious of asthma associated</li> </ul>                                                                                                     |
| <b>EU</b>                                                                                                                                                                                                                                         | /                                                                                                                                                                                                                                                                                                                                              |
| <b>3.1. COPD patients with FEV1&gt; 50%, not symptomatic. What should be the first choice when treating this patient?</b>                                                                                                                         |                                                                                                                                                                                                                                                                                                                                                |
| <b>BE</b>                                                                                                                                                                                                                                         | <ul style="list-style-type: none"> <li>- The risk of exacerbations is high in this group, so optimizing bronchodilation can be important in the prevention of these exacerbations</li> <li>- LAMA can reduce the risk of exacerbations, which is higher in this group of patients</li> <li>- Therapeutic test on dyspnea perception</li> </ul> |
| <b>EU</b>                                                                                                                                                                                                                                         | - This (small) group has never been analyzed - just an extrapolation of existing data                                                                                                                                                                                                                                                          |
| <b>4.1. What should be the first choice when treating a symptomatic COPD patient, with FEV1≤50%, but no exacerbations in the previous 12 months?</b>                                                                                              |                                                                                                                                                                                                                                                                                                                                                |
| <b>BE</b>                                                                                                                                                                                                                                         | <ul style="list-style-type: none"> <li>- Maximal bronchodilation</li> <li>- Better symptom control</li> <li>- The goal is to relieve dyspnoea in this setting. No ICS</li> </ul>                                                                                                                                                               |
| <b>EU</b>                                                                                                                                                                                                                                         | <ul style="list-style-type: none"> <li>- Maximal bronchodilation should be ensured</li> <li>- LABA/LAMA combination has more impact on the symptoms</li> <li>- ICS would not be useful if no exacerbations</li> </ul>                                                                                                                          |
| <b>4.2. If the same patient, with FEV1≤50%, but no exacerbations in the previous 12 months remains symptomatic after initial treatment with a LAMA, what should be the most appropriate treatment?</b>                                            |                                                                                                                                                                                                                                                                                                                                                |
| <b>BE</b>                                                                                                                                                                                                                                         | <ul style="list-style-type: none"> <li>- Step up</li> <li>- ICS are not indicated without exacerbations</li> <li>- Maximal bronchodilation</li> <li>- Adverse events of corticoids</li> </ul>                                                                                                                                                  |
| <b>EU</b>                                                                                                                                                                                                                                         | - Maximal bronchodilation should be ensured                                                                                                                                                                                                                                                                                                    |
| <b>4.3. If the same patient, with FEV1≤50%, but no exacerbations in the previous 12 months remains symptomatic after initial treatment with a LABA, what should be the most appropriate treatment?</b>                                            |                                                                                                                                                                                                                                                                                                                                                |
| <b>BE</b>                                                                                                                                                                                                                                         | <ul style="list-style-type: none"> <li>- Step up</li> <li>- Maximal bronchodilation</li> <li>- Adverse events of corticoids concerning pneumonias, no indication if no frequent exacerbations</li> </ul>                                                                                                                                       |
| <b>EU</b>                                                                                                                                                                                                                                         | - Symptom control may be improved by LABA/LAMA                                                                                                                                                                                                                                                                                                 |
| <b>4.4 If a symptomatic COPD patient has an FEV1≤50% but only 1 exacerbation (requiring treatment with oral corticosteroids and/or antibiotics, but no hospitalisation) in the previous 12 months, what should be the first choice treatment?</b> |                                                                                                                                                                                                                                                                                                                                                |
| <b>BE</b>                                                                                                                                                                                                                                         | - Only one exacerbation and so no ICS are indicated                                                                                                                                                                                                                                                                                            |
| <b>EU</b>                                                                                                                                                                                                                                         | /                                                                                                                                                                                                                                                                                                                                              |
| <b>4.5 If a COPD patient has an FEV1≤50% and 2 exacerbations (requiring treatment with oral corticosteroids and/or antibiotics) or 1 hospitalisation for an exacerbation in the previous 12 months, what should be the first choice?</b>          |                                                                                                                                                                                                                                                                                                                                                |
| <b>BE</b>                                                                                                                                                                                                                                         | - Additive effect of ICS in COPD patients with frequent exacerbations                                                                                                                                                                                                                                                                          |
| <b>EU</b>                                                                                                                                                                                                                                         | - Basic bronchodilator therapy (LABA/LAMA) + ICS to reduce number of exacerbations                                                                                                                                                                                                                                                             |
| <b>4.6. An ICS should always be added to the treatment if a COPD patient had 2 or more exacerbations (requiring treatment with oral corticosteroids and/or antibiotics, but no hospitalisation) in the previous 12 months.</b>                    |                                                                                                                                                                                                                                                                                                                                                |

|                                                                                                                                                         |                                                                                                                                                                                                                                                   |
|---------------------------------------------------------------------------------------------------------------------------------------------------------|---------------------------------------------------------------------------------------------------------------------------------------------------------------------------------------------------------------------------------------------------|
| <b>BE</b>                                                                                                                                               | <ul style="list-style-type: none"> <li>- Answer depends on the potential risk of adverse events</li> <li>- Because of Studies like "Wisdom ", the absolute need of ICS is questioned</li> </ul>                                                   |
| <b>EU</b>                                                                                                                                               | <ul style="list-style-type: none"> <li>- Answer depends on individual patient</li> <li>- Yes if the patient is already on LABA or LAMA (at least awaiting FLAME)</li> <li>- ICS has an essential role for prevention after BDs therapy</li> </ul> |
| <b>4.7. An ICS should always be added to the treatment if a COPD patient had an exacerbation requiring a hospitalisation in the previous 12 months.</b> |                                                                                                                                                                                                                                                   |
| <b>BE</b>                                                                                                                                               | <ul style="list-style-type: none"> <li>- Not always true anymore, depends on the patient</li> <li>- ICS are required in frequent exacerbations but not for one severe exacerbation alone</li> </ul>                                               |
| <b>EU</b>                                                                                                                                               | <ul style="list-style-type: none"> <li>- There is no sufficient evidence that adding ICS to BD will be always effective in preventing exacerbations, requiring a hospitalization</li> </ul>                                                       |
